# Supplementary material for: Assessing minimum pyroclastic density current mass to impact critical infrastructures: example from Aso caldera (Japan)
Source: Copernicus journal article supplement (doi:10.5194/nhess-22-3329-2022), 2022-10-14
Supplement: Supplementary file 3 [file nhess-22-3329-2022-supplement.zip]

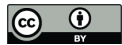

*Supplement of*

**Assessing minimum pyroclastic density current mass to impact critical infrastructures: example from Aso caldera (Japan)**

**Andrea Bevilacqua et al.**

*Correspondence to:* Andrea Bevilacqua ([andrea.bevilacqua@ingv.it](mailto:andrea.bevilacqua@ingv.it))

- [nhess-22-3329-2022-supplement-title-page.pdf](#)
- [SupportingInformation\\_revised.docx](#)
- [textS1.pdf](#)
- [textS2.pdf](#)

The copyright of individual parts of the supplement might differ from the article licence.
